# Supplementary material for: Fabrication of non-collapsed hollow polymeric nanoparticles with shell thickness in the order of ten nanometres and anti-reflection coatings
Source: Royal Society of Chemistry journal article supplement (doi:10.1039/c0sm00983k), 2010-11-18
Supplement: c0sm00983k.pdf [file c0sm00983k.pdf]

### Supplementary Information

The pores in the shell of the hollow nanoparticles in run 6 were characterized by nitrogen adsorption-desorption isotherms. The results are presented in Fig. S1. Nitrogen adsorption-desorption analysis was conducted at 77 K by Quantachrome Autosorb-1-C (Quantachrome Company). The corresponding pore size distribution was calculated by the NLDFT (Non-Local Density Functional Theory) method, and the specific surface area was BET (Brunauer–Emmett–Teller) surface area.

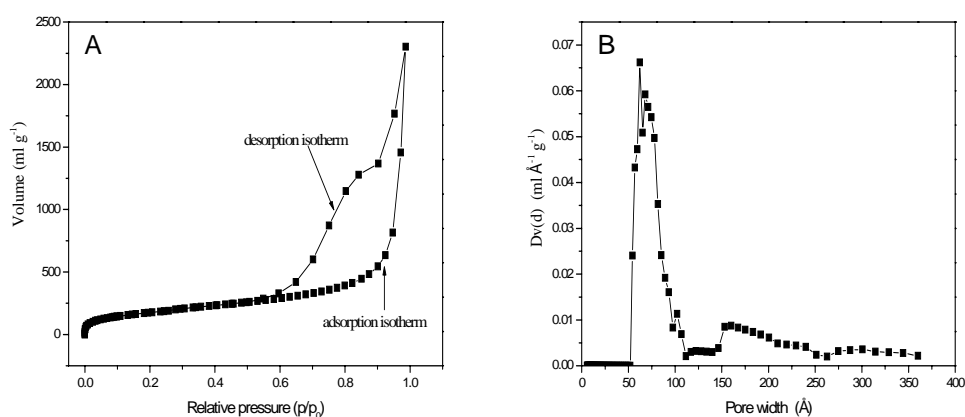

Fig. S1 Nitrogen adsorption–desorption isotherms at 77 K (A) and the size distribution (B) of the pores in nano-shell of the hollow nanoparticles in run 6 with the core/shell ratio of 1/1 and 100 wt% DVB.

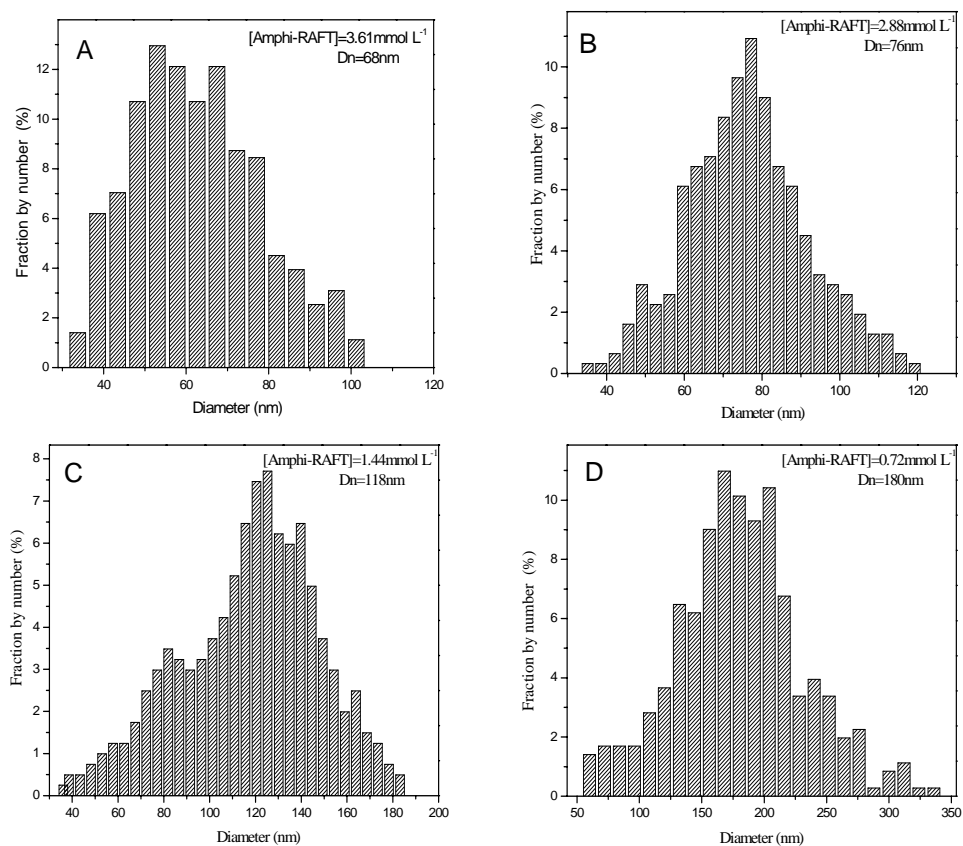

Fig. S2 The size distribution and average diameter ( $D_n$ ) of the hollow nanoparticles in runs 7-10 with various levels of amphi-RAFT according to TEM images statistics: (A)  $3.61 \text{ mmol L}^{-1}$ ; (B)  $2.88 \text{ mmol L}^{-1}$ ; (C)  $1.44 \text{ mmol L}^{-1}$ ; (D)  $0.72 \text{ mmol L}^{-1}$ .
